# Supplementary material
Source: PubMed Central journal article supplement (PMC7484233)
Supplement: NIHMS1611745-supplement-Supplemental_Material.pdf [file NIHMS1611745-supplement-Supplemental_Material.pdf]

# SUPPLEMENTAL MATERIALS

## **Single Cell Transcriptomic Profiling of Vascular Smooth Muscle Cell Phenotype Modulation in Marfan Syndrome Aortic Aneurysm**

Albert J. Pedroza MD<sup>1</sup>, Yasushi Tashima MD<sup>1</sup>, Rohan Shad MD<sup>1</sup>, Paul Cheng MD PhD<sup>2</sup>, Robert Wirka MD<sup>2</sup>, Samantha Churovich<sup>1</sup>, Ken Nakamura MD<sup>1</sup>, Nobu Yokoyama MD<sup>1</sup>, Jason Z. Cui PhD<sup>1</sup>, Cristiana Iosef DVM PhD<sup>1</sup>, William Hiesinger MD<sup>1</sup>, Thomas Quertermous MD<sup>2</sup>, Michael P. Fischbein MD PhD<sup>1</sup>

<sup>1</sup>Department of Cardiothoracic Surgery, Stanford University School of Medicine. Stanford CA, USA

<sup>2</sup>Division of Cardiovascular Medicine, Stanford University School of Medicine. Stanford CA, USA

## Major Resources Table

In order to allow validation and replication of experiments, all essential research materials listed in the Methods should be included in the Major Resources Table below. Authors are encouraged to use public repositories for protocols, data, code, and other materials and provide persistent identifiers and/or links to repositories when available. Authors may add or delete rows as needed.

### Genetically Modified Animals

|                        | Species | Vendor or Source       | Background Strain | Other Information                        | Persistent ID / URL                                                               |
|------------------------|---------|------------------------|-------------------|------------------------------------------|-----------------------------------------------------------------------------------|
| <b>Parent - Male</b>   | Mouse   | The Jackson Laboratory | C57BL/6J          | Fbn1 <sup>C1041G/+</sup><br>Heterozygous | <a href="https://www.jax.org/strain/012885">https://www.jax.org/strain/012885</a> |
| <b>Parent - Female</b> | Mouse   | The Jackson Laboratory | C57BL/6J          | Littermate Controls                      |                                                                                   |

### RNA *in-situ* hybridization Probes

| Target Gene* | Vendor or Source          | Catalog # | Persistent ID / URL                                                               |
|--------------|---------------------------|-----------|-----------------------------------------------------------------------------------|
| Hu TNFRSF11B | Advanced Cell Diagnostics | 412291-C2 | <a href="https://acdbio.com/catalog-probes">https://acdbio.com/catalog-probes</a> |
| Hu SERPINE1  | Advanced Cell Diagnostics | 555961    | <a href="https://acdbio.com/catalog-probes">https://acdbio.com/catalog-probes</a> |
| Mm Tnfrsf11b | Advanced Cell Diagnostics | 488961    | <a href="https://acdbio.com/catalog-probes">https://acdbio.com/catalog-probes</a> |
| Mm Mmp2      | Advanced Cell Diagnostics | 315931-C2 | <a href="https://acdbio.com/catalog-probes">https://acdbio.com/catalog-probes</a> |

\*Note: Probe sequences are proprietary

### Data & Code Availability

| Description                                                                              | Repository                         | Persistent ID / URL      |
|------------------------------------------------------------------------------------------|------------------------------------|--------------------------|
| Fbn1 <sup>C1041G/+</sup> and Control aortic scRNAseq FASTQ files and gene count matrices | NCBI Gene Expression Omnibus (GEO) | Accession Number Pending |
| Marfan Human patient aortic scRNAseq FASTQ file and gene count matrix                    | NCBI Gene Expression Omnibus (GEO) | Accession Number Pending |

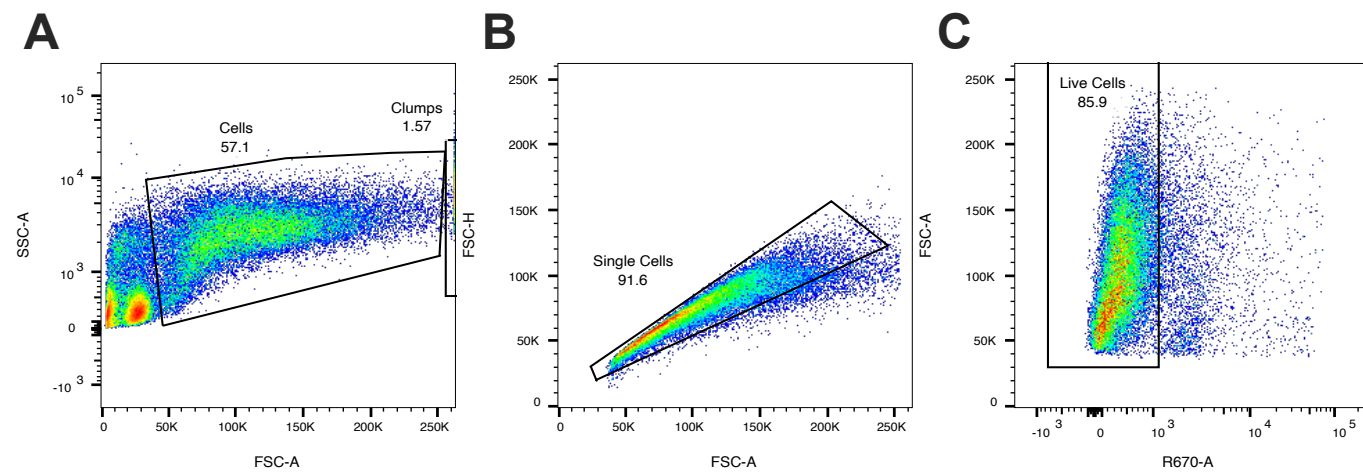

**Supplemental Figure I: FACS gating strategy.** **A** Representative scatter from enzymatically dispersed aortic root tissue. Largest events on upper forward scatter margin excluded to reduce doublets and clumps **B** Secondary gating for doublet exclusion **C** Live/dead discrimination gate using 7AAD as nonviable cell marker. Plots representative of all samples used for scRNAseq.

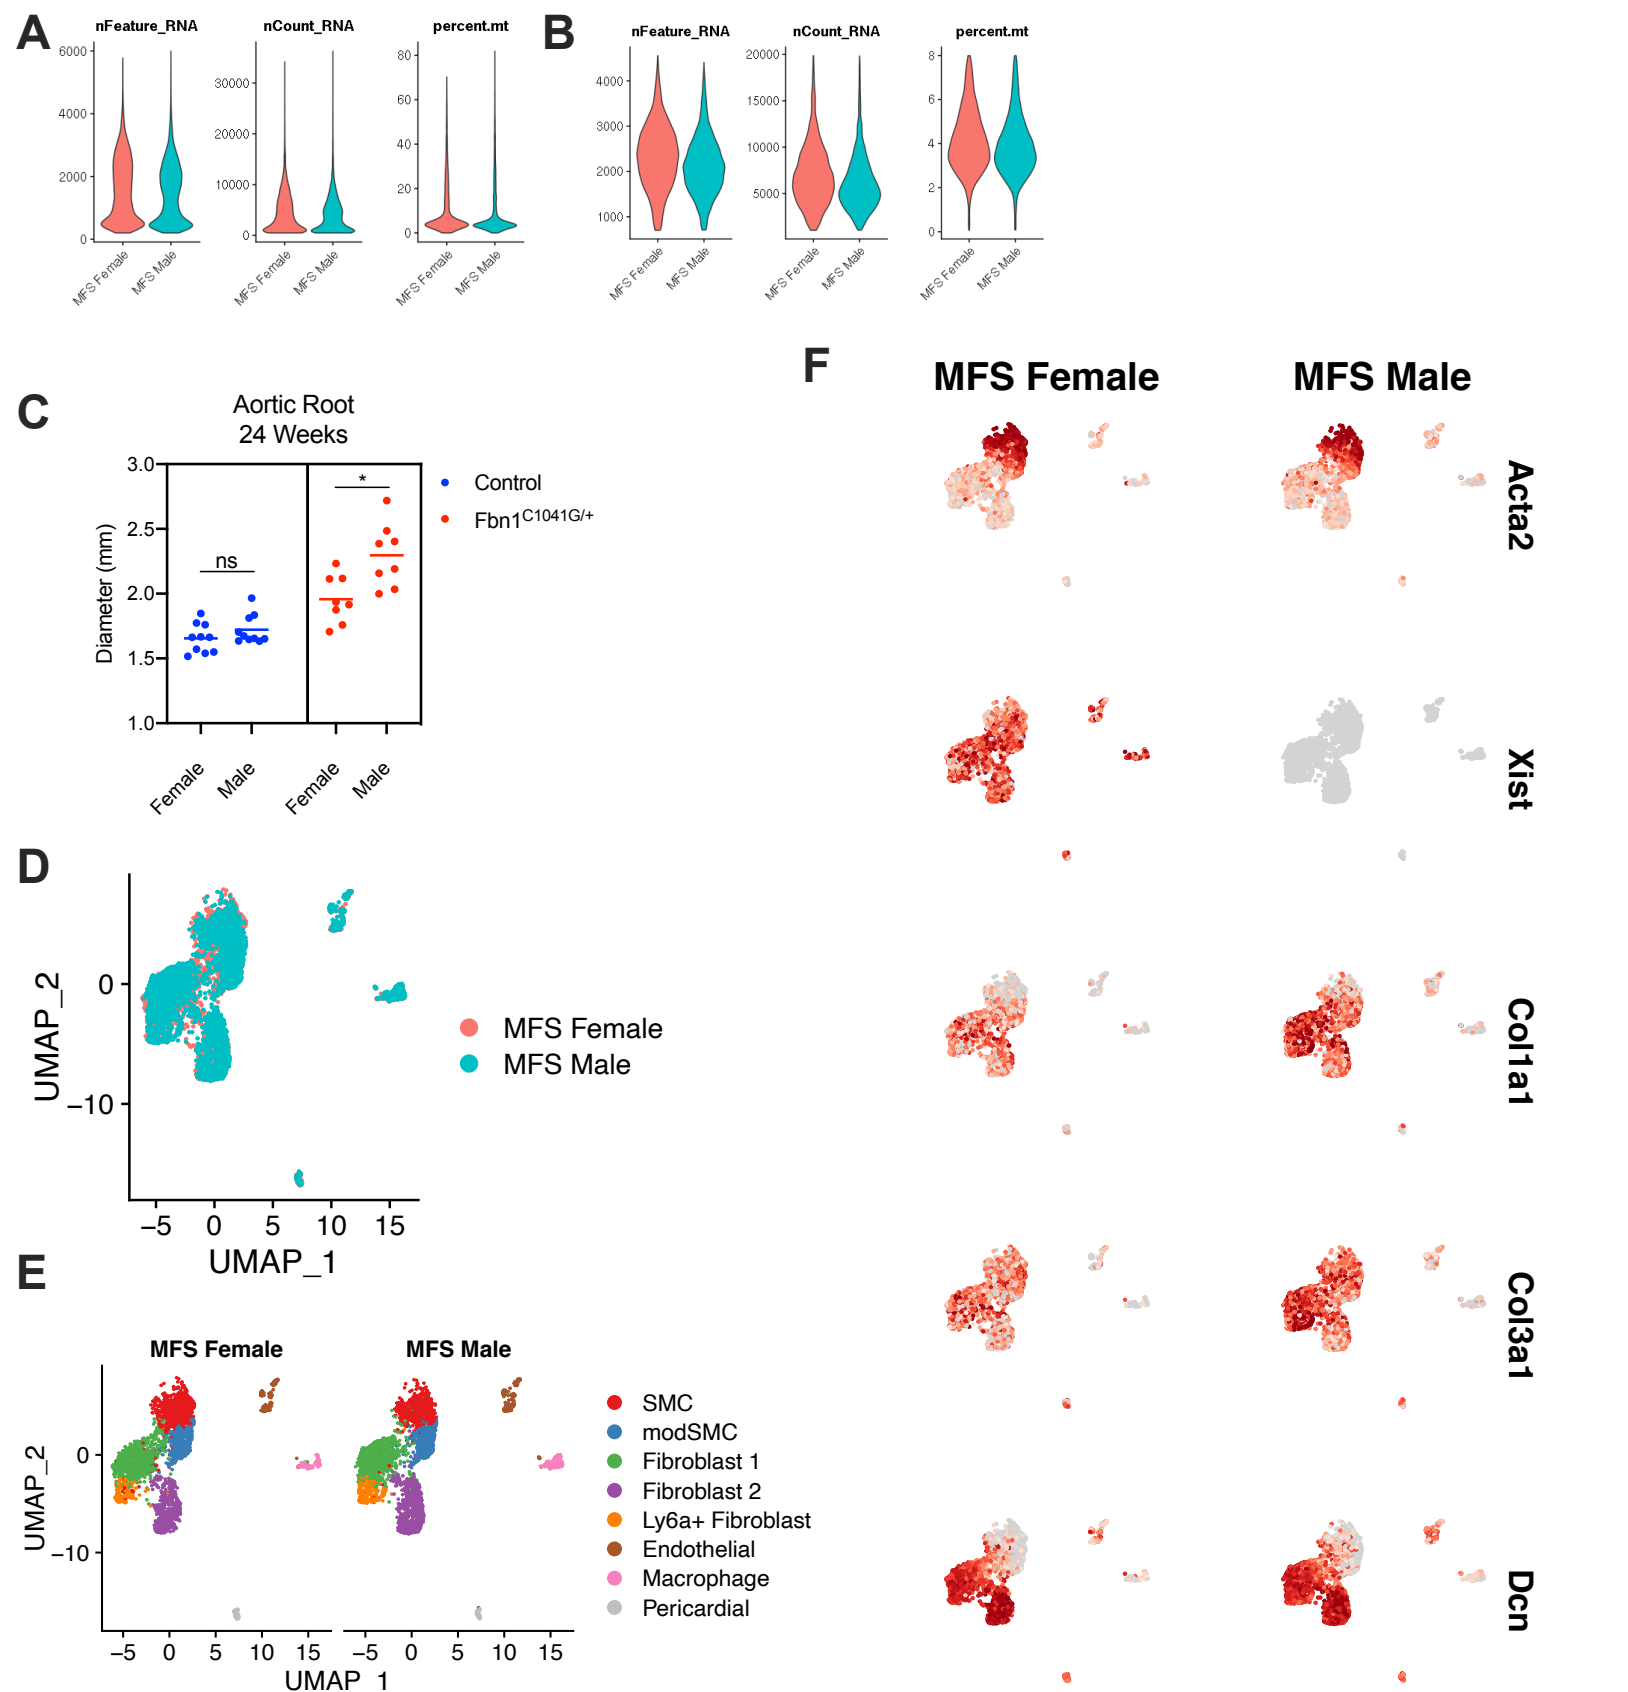

**Supplemental Figure II: scRNAseq dataset quality control. A** Violin plots for raw (unfiltered) dataset. Raw cells were filtered to exclude low feature counts (free RNA), high feature counts (doublets), and high mitochondrial RNA content ('percent.mt', representing dead/apoptotic cells). **B** Post QC datasets **C** Aortic root measurements by transthoracic echocardiography in 24 week-old mice. Male *Fbn1*<sup>C1041G/+</sup> mice display significantly greater aneurysm size. \*Denotes  $p < 0.05$  by Mann-Whitney U non-parametric test. **D** Overlaid UMAP projection of male/female 24-week aortic root/ascending samples demonstrating consistent distribution within non-linear reduction between samples **E** UMAP projection of technical replicate samples revealing grossly equal contribution of each sample to every cell cluster within the projection. **F** Expression plots for SMC marker *Acta2*, representative sex-specific gene (*Xist*), and genes enriched in MFS male samples (*Col1a1*, *Col3a1*, *Dcn*).

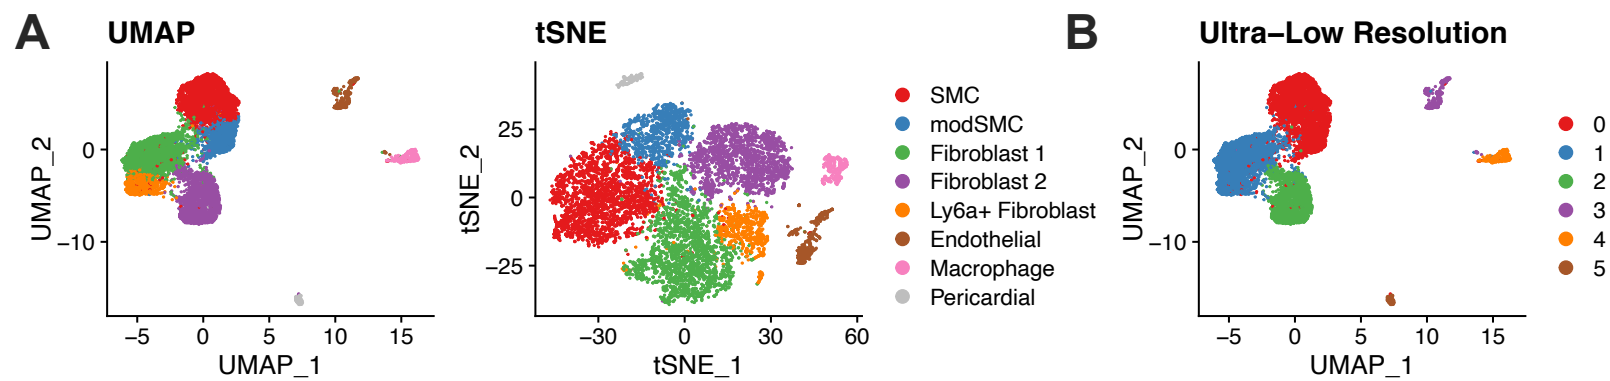

**Supplemental Figure III:** 24-week scRNAseq dataset from control and *Fbn1*<sup>C1041G/+</sup> mouse aortic root/ascending aortas. **A** Modulated SMC cluster is positioned directly between SMC and fibroblast clusters in both UMAP projection and tSNE dimensional projections. **B** Under ultra-low cell clustering resolution, modSMCs cluster with SMCs (Cluster '0').

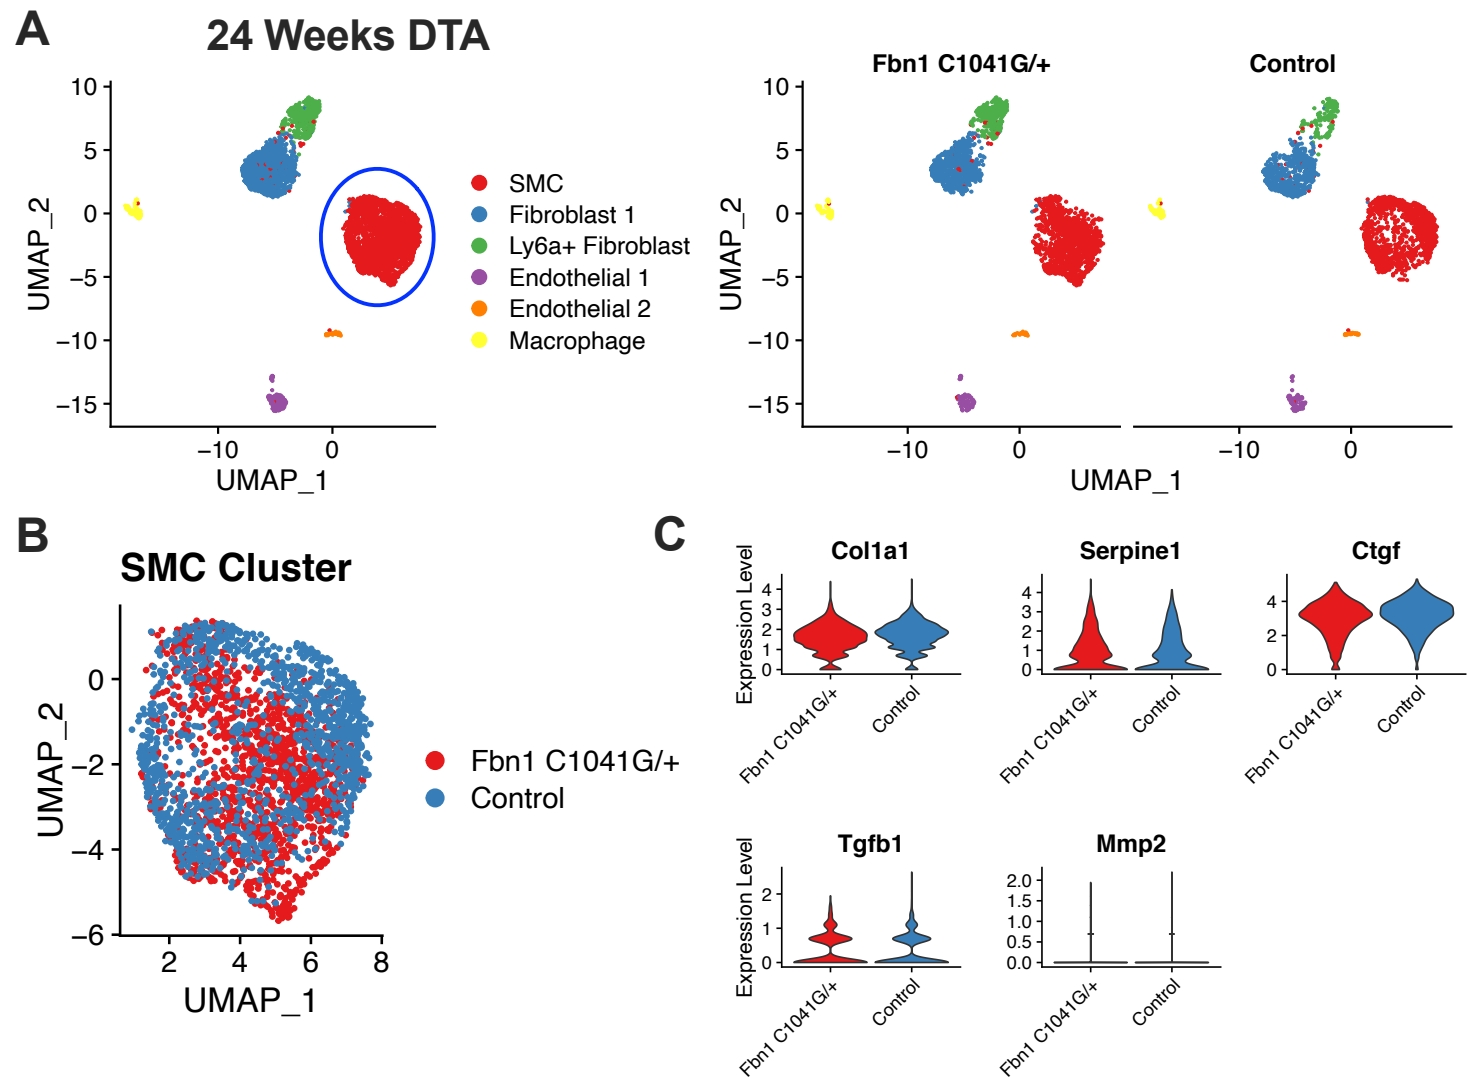

**Supplemental Figure IV:** scRNAseq from descending thoracic aorta (DTA) in 24 week-old *Fbn1*<sup>C1041G/+</sup> and control mice. **A** UMAP dimensional reduction of >4,700 cells in merged dataset (n=3 each genotype) and split by genotype. Circled cluster indicates SMCs subsampled for analysis. **B** Overlaid UMAP projection of DTA SMCs color-coded by genotype. **C** Violin plots showing no significant differences in gene expression of *Col1a1*, *Serpine1*, *Ctgf*, *Tgfb1* and trivial expression of *Mmp2* in either sample.

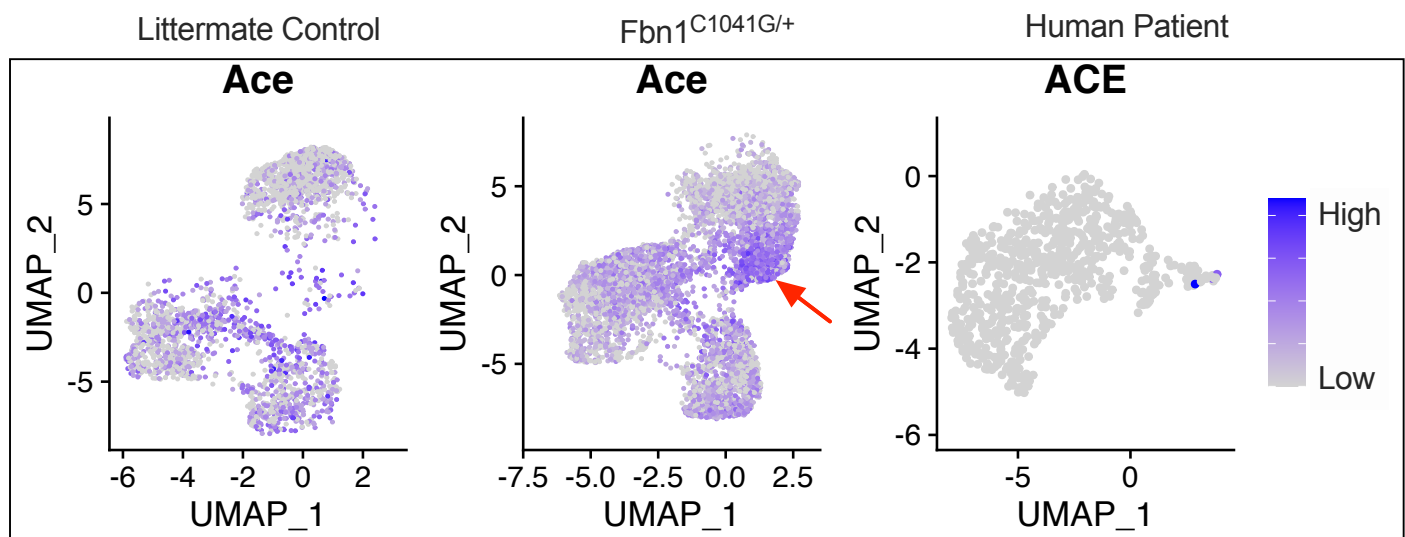

**Supplemental Figure V:** Angiotensin converting enzyme (*Ace*) expression in murine and human scRNAseq datasets. SMC/modSMC and fibroblast clusters depicted for each sample. Red arrow indicates enriched expression in Fbn1<sup>C1041G/+</sup> modSMC cluster, while *ACE* expression is not detectable in human aortic root tissue dataset.

## Aortic Root/Ascending Bulk RT-PCR

**Myh11**

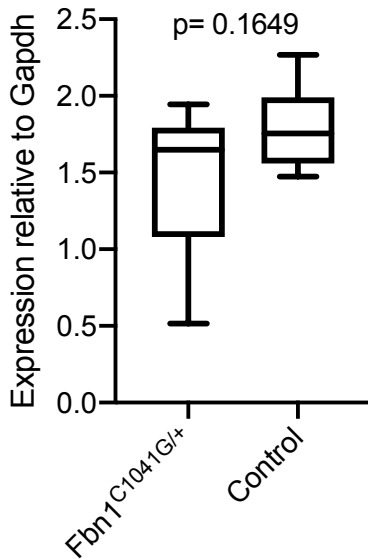

**Acta2**

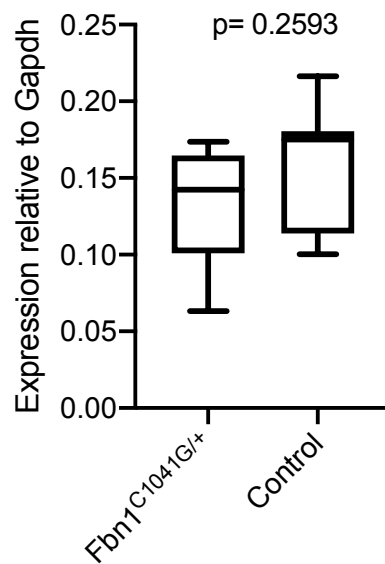

**Tagln**

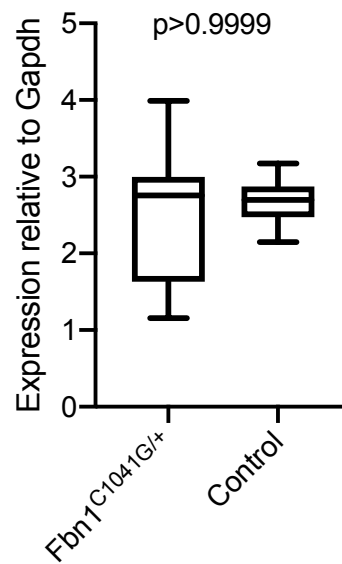

**Supplemental Figure VI:** Bulk tissue RT-PCR for contractile genes *Myh11*, *Acta2*, *Tagln* in 24-week-old *Fbn1<sup>C1041G/+</sup>* and control mice (n=7 animals each genotype).
